# Supplementary material for: Linking Clinical Blood Metabogram and Gut Microbiota
Source: MDPI journal article supplement (doi:10.3390/metabo13101095), 2023-10-19
Supplement: s1 [file s1]

## Supplementary Materials

Males

(a)

metabogram components

positive

negative

12345671234567

MICROBIOTA

Enterobacteriaceae0.360.960.400.440.350.570.670.870.390.470.350.720.980.49

Staphylococcus0.400.850.600.040.470.930.510.090.130.320.050.150.060.67

Enterococcus0.580.240.210.210.240.690.950.420.280.880.410.930.350.97

Aerobic bacteria0.520.280.410.960.560.650.090.310.310.240.250.260.550.68

Anaerobic bacteria0.790.880.960.420.380.730.430.580.600.910.360.510.350.39

Hemolytic aerobic bacteria0.460.600.550.990.590.300.360.330.180.690.140.160.620.95

Hemolytic anaerobic bacteria0.920.770.970.460.440.140.100.180.080.750.070.450.690.83

Lactobacillus0.770.780.770.630.920.650.660.240.750.550.590.080.300.13

Citrate-assimilating Enterobacteria0.360.270.350.750.210.100.320.480.740.270.670.850.330.47

Bifidobacteria0.650.020.470.740.410.160.000.290.250.130.190.510.170.69

Sulfite-reducing Clostridia0.600.140.080.620.260.870.110.600.740.500.260.810.760.76

Yeasts0.120.0020.010.050.050.0010.950.720.0040.250.030.020.300.06

Bacteroides0.840.170.020.540.600.020.800.330.260.130.840.110.860.92

Antagonistic activity of Bifidobacteria0.440.990.460.380.860.150.370.060.140.090.280.160.120.71

Females

(b)

metabogram components

positive

negative

12345671234567

MICROBIOTA

Enterobacteriaceae0.060.850.410.110.420.950.280.170.140.550.180.320.080.23

Staphylococcus0.110.660.690.770.540.730.850.470.270.630.460.860.530.23

Enterococcus0.250.670.470.500.910.890.740.410.630.510.780.820.480.17

Aerobic bacteria0.350.890.820.380.980.990.350.470.270.530.220.440.160.46

Anaerobic bacteria0.730.500.360.730.430.220.300.570.780.340.720.190.820.69

Hemolytic aerobic bacteria0.360.800.950.480.690.840.340.440.290.440.160.560.140.42

Hemolytic anaerobic bacteria0.830.670.610.720.430.300.620.520.940.940.820.530.600.72

Lactobacillus0.130.640.750.510.480.850.340.300.740.390.830.800.420.46

Citrate-assimilating Enterobacteria0.060.080.200.220.520.600.370.570.520.080.570.710.590.57

Bifidobacteria0.140.830.500.190.730.240.380.070.110.130.160.380.130.92

Sulfite-reducing Clostridia0.080.890.830.280.210.110.670.140.470.280.440.230.190.41

Yeasts0.450.950.230.180.200.310.200.310.610.200.910.160.280.66

Bacteroides0.240.820.450.180.820.060.140.090.010.730.020.040.090.97

Antagonistic activity of Bifidobacteria0.100.700.470.060.370.670.630.090.080.420.050.810.070.91

**Figure S1.** p-Values for the correlation of gut microorganism levels (assessed by a culture-based method) with the metabogram components calculated for healthy individuals and individuals with various degrees of body weight deviation. The p-value tests the hypothesis of no correlation against the alternative hypothesis of a nonzero correlation. P-values <0.05 (rejection of the hypothesis that no correlation exists) are selected by the red color. Data is presented for males (**a**) and females (**b**).

| Males (a)                                              |          |      |      |      |      |      |      |          |      |      |      |      |      |      |
|--------------------------------------------------------|----------|------|------|------|------|------|------|----------|------|------|------|------|------|------|
| metabogram components                                  |          |      |      |      |      |      |      |          |      |      |      |      |      |      |
| MICROBIOME                                             | positive |      |      |      |      |      |      | negative |      |      |      |      |      |      |
|                                                        | 1        | 2    | 3    | 4    | 5    | 6    | 7    | 1        | 2    | 3    | 4    | 5    | 6    | 7    |
| Total bacteria                                         | 0.91     | 0.26 | 0.20 | 0.48 | 0.53 | 0.91 | 0.48 | 0.92     | 0.74 | 0.22 | 0.69 | 0.96 | 0.51 | 0.37 |
| <i>Lactobacillus</i> spp.                              | 0.69     | 0.90 | 0.90 | 0.14 | 0.27 | 0.97 | 0.54 | 0.36     | 0.97 | 0.09 | 0.24 | 0.32 | 0.47 | 0.12 |
| <i>Bifidobacterium</i> spp.                            | 1.00     | 0.42 | 0.20 | 0.61 | 0.59 | 0.83 | 0.25 | 0.26     | 0.77 | 0.98 | 0.44 | 0.09 | 0.48 | 0.03 |
| <i>Escherichia coli</i>                                | 0.53     | 0.11 | 0.47 | 0.16 | 0.58 | 0.43 | 0.07 | 0.08     | 0.32 | 0.19 | 0.05 | 0.70 | 0.10 | 0.42 |
| <i>Bacteroides fragilis</i> group                      | 0.83     | 0.21 | 0.16 | 0.23 | 0.64 | 0.84 | 0.65 | 0.76     | 0.69 | 0.25 | 0.90 | 0.61 | 0.35 | 0.72 |
| <i>Faecalibacterium prausnitzii</i>                    | 0.92     | 0.16 | 0.26 | 0.64 | 0.56 | 0.62 | 0.09 | 0.08     | 0.64 | 0.72 | 0.22 | 0.10 | 0.18 | 0.23 |
| <i>Klebsiella pneumoniae</i>                           | 0.21     | 0.20 | 0.25 | 0.66 | 0.52 | 0.25 | 0.30 | 0.17     | 0.70 | 0.50 | 0.78 | 0.57 | 0.43 | 0.42 |
| <i>Escherichia coli</i> enteropathogenic               | 0.58     | 0.18 | 0.39 | 0.98 | 0.94 | 0.08 | 0.10 | 0.63     | 0.90 | 0.65 | 0.28 | 0.47 | 0.81 | 0.66 |
| <i>Enterococcus</i> spp.                               | 0.86     | 0.88 | 0.83 | 0.13 | 0.07 | 0.97 | 0.47 | 0.12     | 0.35 | 0.03 | 0.07 | 0.28 | 0.12 | 0.72 |
| <i>Bacteroides thetaiotaomicron</i>                    | 0.54     | 0.79 | 0.90 | 0.64 | 0.81 | 0.12 | 0.94 | 0.96     | 0.28 | 0.26 | 0.39 | 0.49 | 0.83 | 0.37 |
| <i>Clostridium perfringens</i>                         | 0.99     | 0.21 | 0.02 | 0.53 | 0.23 | 0.73 | 0.15 | 0.88     | 0.95 | 0.91 | 0.36 | 0.68 | 0.67 | 0.89 |
| <i>Enterobacter</i> spp. and <i>Citrobacter</i> spp.   | 0.70     | 0.34 | 0.72 | 0.17 | 0.44 | 0.52 | 0.36 | 0.27     | 0.61 | 0.15 | 0.20 | 0.89 | 0.22 | 0.43 |
| <i>Parvimonas micra</i>                                | 0.83     | 0.48 | 0.51 | 0.47 | 0.91 | 0.07 | 0.72 | 0.82     | 0.05 | 0.36 | 0.14 | 0.11 | 0.32 | 0.43 |
| <i>B. fragilis</i> group / <i>F. prausnitzii</i> ratio | 0.50     | 0.67 | 0.51 | 0.22 | 0.59 | 0.49 | 0.17 | 0.20     | 0.69 | 0.57 | 0.48 | 0.33 | 0.10 | 0.43 |

  

| Females (b)                                            |          |      |      |       |      |      |      |          |       |      |        |      |      |      |
|--------------------------------------------------------|----------|------|------|-------|------|------|------|----------|-------|------|--------|------|------|------|
| metabogram components                                  |          |      |      |       |      |      |      |          |       |      |        |      |      |      |
| MICROBIOME                                             | positive |      |      |       |      |      |      | negative |       |      |        |      |      |      |
|                                                        | 1        | 2    | 3    | 4     | 5    | 6    | 7    | 1        | 2     | 3    | 4      | 5    | 6    | 7    |
| Total bacteria                                         | 0.97     | 0.07 | 0.13 | 0.75  | 0.90 | 0.39 | 0.73 | 0.71     | 0.57  | 0.92 | 0.80   | 0.98 | 0.73 | 0.63 |
| <i>Lactobacillus</i> spp.                              | 0.95     | 0.95 | 0.85 | 0.46  | 0.14 | 0.30 | 0.34 | 0.91     | 0.22  | 0.62 | 0.42   | 0.18 | 0.57 | 0.37 |
| <i>Bifidobacterium</i> spp.                            | 0.26     | 0.59 | 0.86 | 0.61  | 0.48 | 0.37 | 0.53 | 0.97     | 0.85  | 0.97 | 0.90   | 0.74 | 0.50 | 0.37 |
| <i>Escherichia coli</i>                                | 0.55     | 0.80 | 0.70 | 0.42  | 0.40 | 0.49 | 0.28 | 0.77     | 0.50  | 0.63 | 0.55   | 0.41 | 0.86 | 0.37 |
| <i>Bacteroides fragilis</i> group                      | 0.51     | 0.24 | 0.34 | 0.66  | 0.83 | 0.97 | 0.42 | 0.54     | 0.99  | 0.68 | 0.64   | 0.40 | 0.59 | 0.63 |
| <i>Faecalibacterium prausnitzii</i>                    | 0.16     | 0.90 | 0.46 | 0.49  | 0.55 | 0.50 | 0.71 | 0.90     | 0.60  | 0.13 | 0.89   | 0.25 | 0.83 | 0.40 |
| <i>Klebsiella pneumoniae</i>                           | 0.02     | 0.10 | 0.14 | 0.68  | 0.90 | 0.23 | 0.89 | 0.25     | 0.23  | 0.54 | 0.53   | 0.63 | 0.81 | 0.65 |
| <i>Enterococcus</i> spp.                               | 0.05     | 0.56 | 0.17 | 0.21  | 0.16 | 0.65 | 0.64 | 0.89     | 0.33  | 0.64 | 0.55   | 0.68 | 0.69 | 0.41 |
| <i>Bacteroides thetaiotaomicron</i>                    | 0.17     | 0.29 | 0.28 | 0.82  | 0.01 | 0.05 | 0.84 | 0.85     | 0.48  | 0.09 | 0.34   | 0.32 | 0.72 | 0.62 |
| <i>Enterobacter</i> spp. and <i>Citrobacter</i> spp.   | 0.36     | 0.41 | 0.35 | 0.29  | 0.68 | 0.13 | 0.30 | 0.76     | 0.09  | 0.75 | 0.24   | 0.20 | 0.99 | 0.43 |
| <i>Fusobacterium nucleatum</i>                         | 0.53     | 0.65 | 0.72 | 0.32  | 0.55 | 0.95 | 0.37 | 0.19     | 0.52  | 0.37 | 0.34   | 0.71 | 0.13 | 0.98 |
| <i>Parvimonas micra</i>                                | 0.62     | 0.97 | 0.16 | 0.004 | 0.57 | 0.31 | 0.01 | 0.07     | 0.001 | 0.26 | 0.0003 | 0.05 | 0.01 | 0.91 |
| <i>B. fragilis</i> group / <i>F. prausnitzii</i> ratio | 0.94     | 0.59 | 0.76 | 0.84  | 0.26 | 0.23 | 0.65 | 0.72     | 0.86  | 0.30 | 0.76   | 0.19 | 0.73 | 0.50 |

**Figure S2.** p-Values for the correlation of gut microorganism levels (assessed by a real-time PCR analysis) with the metabogram components calculated for healthy individuals and individuals with various degrees of body weight deviation. The p-value tests the hypothesis of no correlation against the alternative hypothesis of a nonzero correlation. P-values <0.05 (rejection of the hypothesis that no correlation exists) are selected by the red color. Data is presented for males (a) and females (b).

**Table S3.** Statistical data for gut microbiota test results calculated for males and females separately.

|                        |                                          | Males  |        | Females |       |
|------------------------|------------------------------------------|--------|--------|---------|-------|
|                        |                                          | mean   | st.d.  | mean    | st.d. |
| Culture-based method   | Enterobacteriaceae                       | 6.97   | 1.08   | 7.30    | 1.01  |
|                        | Staphylococcus                           | 5.50   | 1.02   | 5.82    | 1.47  |
|                        | Coagulase Positive Staphylococci         | -      | -      | -       | -     |
|                        | Enterococcus                             | 6.12   | 0.78   | 6.13    | 1.16  |
|                        | Aerobic bacteria                         | 7.62   | 0.82   | 7.86    | 0.84  |
|                        | Anaerobic bacteria                       | 10.04  | 0.84   | 9.44    | 0.98  |
|                        | Hemolytic aerobic bacteria               | 7.25   | 0.86   | 7.42    | 1.35  |
|                        | Hemolytic anaerobic bacteria             | 8.99   | 1.24   | 8.56    | 1.26  |
|                        | Lactobacillus                            | 7.20   | 0.92   | 7.21    | 1.11  |
|                        | citrate-assimilating enterobacteria      | 6.22   | 0.93   | 5.92    | 0.71  |
|                        | Bifidobacteria                           | 8.68   | 0.85   | 8.61    | 1.09  |
|                        | Sulfite-reducing Clostridia              | 7.16   | 0.99   | 7.22    | 0.88  |
|                        | Yeasts                                   | 3.12   | 0.85   | 3.06    | 1.18  |
|                        | Bacteroides                              | 8.89   | 1.04   | 8.13    | 1.37  |
|                        | Antagonistic activity of Bifidobacteria  | 4.30   | 0.22   | 4.17    | 0.16  |
|                        | Total bacteria                           | 13.55  | 0.62   | 13.83   | 0.40  |
|                        | Lactobacillus spp.                       | 8.75   | 1.11   | 8.73    | 1.10  |
|                        | Bifidobacterium spp.                     | 12.32  | 1.05   | 12.68   | 0.67  |
|                        | Escherichia coli                         | 9.43   | 0.99   | 10.07   | 0.68  |
|                        | Bacteroides fragilis group               | 13.32  | 0.82   | 13.50   | 0.42  |
| Real-time PCR analysis | Faecalibacterium prausnitzii             | 12.05  | 0.76   | 12.25   | 0.35  |
|                        | Klebsiella pneumoniae                    | 1.36   | 2.62   | 2.62    | 3.25  |
|                        | Klebsiella oxytoca                       | 0.38   | 1.60   | 1.05    | 2.46  |
|                        | Candida spp.                             | -      | -      | -       | -     |
|                        | Staphylococcus aureus                    | -      | -      | -       | -     |
|                        | Escherichia coli enteropathogenic        | 2.93   | 3.46   | -       | -     |
|                        | Enterococcus spp.                        | 6.55   | 3.22   | 6.17    | 2.59  |
|                        | Bacteroides thetaiotaomicron             | 10.05  | 2.78   | 6.55    | 5.05  |
|                        | Clostridium difficile                    | -      | -      | -       | -     |
|                        | Clostridium perfringens                  | 2.36   | 3.52   | 1.55    | 3.69  |
|                        | Proteus vulgaris and Proteus mirabilis   | -      | -      | -       | -     |
|                        | Enterobacter spp. and Citrobacter spp.   | 8.95   | 0.96   | 9.54    | 0.85  |
|                        | Fusobacterium nucleatum                  | -      | -      | 2.70    | 4.04  |
|                        | Parvimonas micra                         | 6.51   | 3.66   | 6.96    | 3.33  |
|                        | Salmonella spp.                          | -      | -      | -       | -     |
|                        | Shigella spp.                            | -      | -      | -       | -     |
|                        | B. fragilis group / F. prausnitzii ratio | 125.47 | 387.36 | 23.45   | 22.17 |
